# Supplementary material for: Opportunities for targeted therapies: trametinib as a therapeutic approach to canine oral squamous cell carcinomas
Source: Research Square preprint supplement (doi:10.21203/rs.3.rs-4289451/v1), 2024-05-02
Supplement: Supplementary file 1 [file 4e14aecba8664d70fac216c1.docx]

Canine MAPGAPWGRT MRDAGLIRRR SWRRGWRSGP DPLDGPSSPH GGGRRPDRTP

Mouse ---------- ---------- ---------- ---------- ----------

Human ---------- ---------- ---------- ---------- ----------

Canine LQAPHGGWGL PGLAPTPPGR TRARGRAASL QLFADKVPKT AENFRALSTG

Mouse MVNPTVFFDI -------TAD DEPL**G**RV-SF ELFADKVPKT AENFRALSTG

Human MVNPTVFFDI -------AVD GEPLGRV-SF ELFADKVPKT AENFRALSTG

Canine EKGFGYKGSC FHRIIPGFMC QGGDFTRHNG TGGKSIYGEK FDDENFILKH

Mouse EKGFGYKGSS FHRIIPGFMC QGGDFTRHNG TGGRSIYGEK FEDENFILKH

Human EKGFGYKGSC FHRIIPGFMC QGGDFTRHNG TGGKSIYGEK FEDENFILKH

Canine TGPGILSMAN AGPNTNGSQF FICTAKTECC LQVGRQACGL WQGQGGHEHR

Mouse TGPGILSMAN AGPNTNGSQF FICTAKTEWL DGKHVVFGKV KEGMNIVE--

Human TGPGILSMAN AGPNTNGSQF FICTAKTEWL DGKHVVFGKV KEGMNIVE—

Canine GSHGALRVQE WQDQQEDHHR RLWTDLMNLN SCFI

Mouse ------AMER FGSRNGKTS- ----KKITIS DCGQL

Human ------AMER FGSRNGKTS- ----KKITIA DCGQLE

**Figure S1: Cyclophilin A in canine, mouse, and human.** The sequences of canine, mouse, and human CypA were aligned with BLAST. The highlighted region is targeted by the CypA antibody used in **Figure 3A**, with the bolded, red-colored glycine residue of mouse CypA being specified as the target antigen in the product documentation. Canine CypA is clearly less similar to mouse CypA than is the human protein.


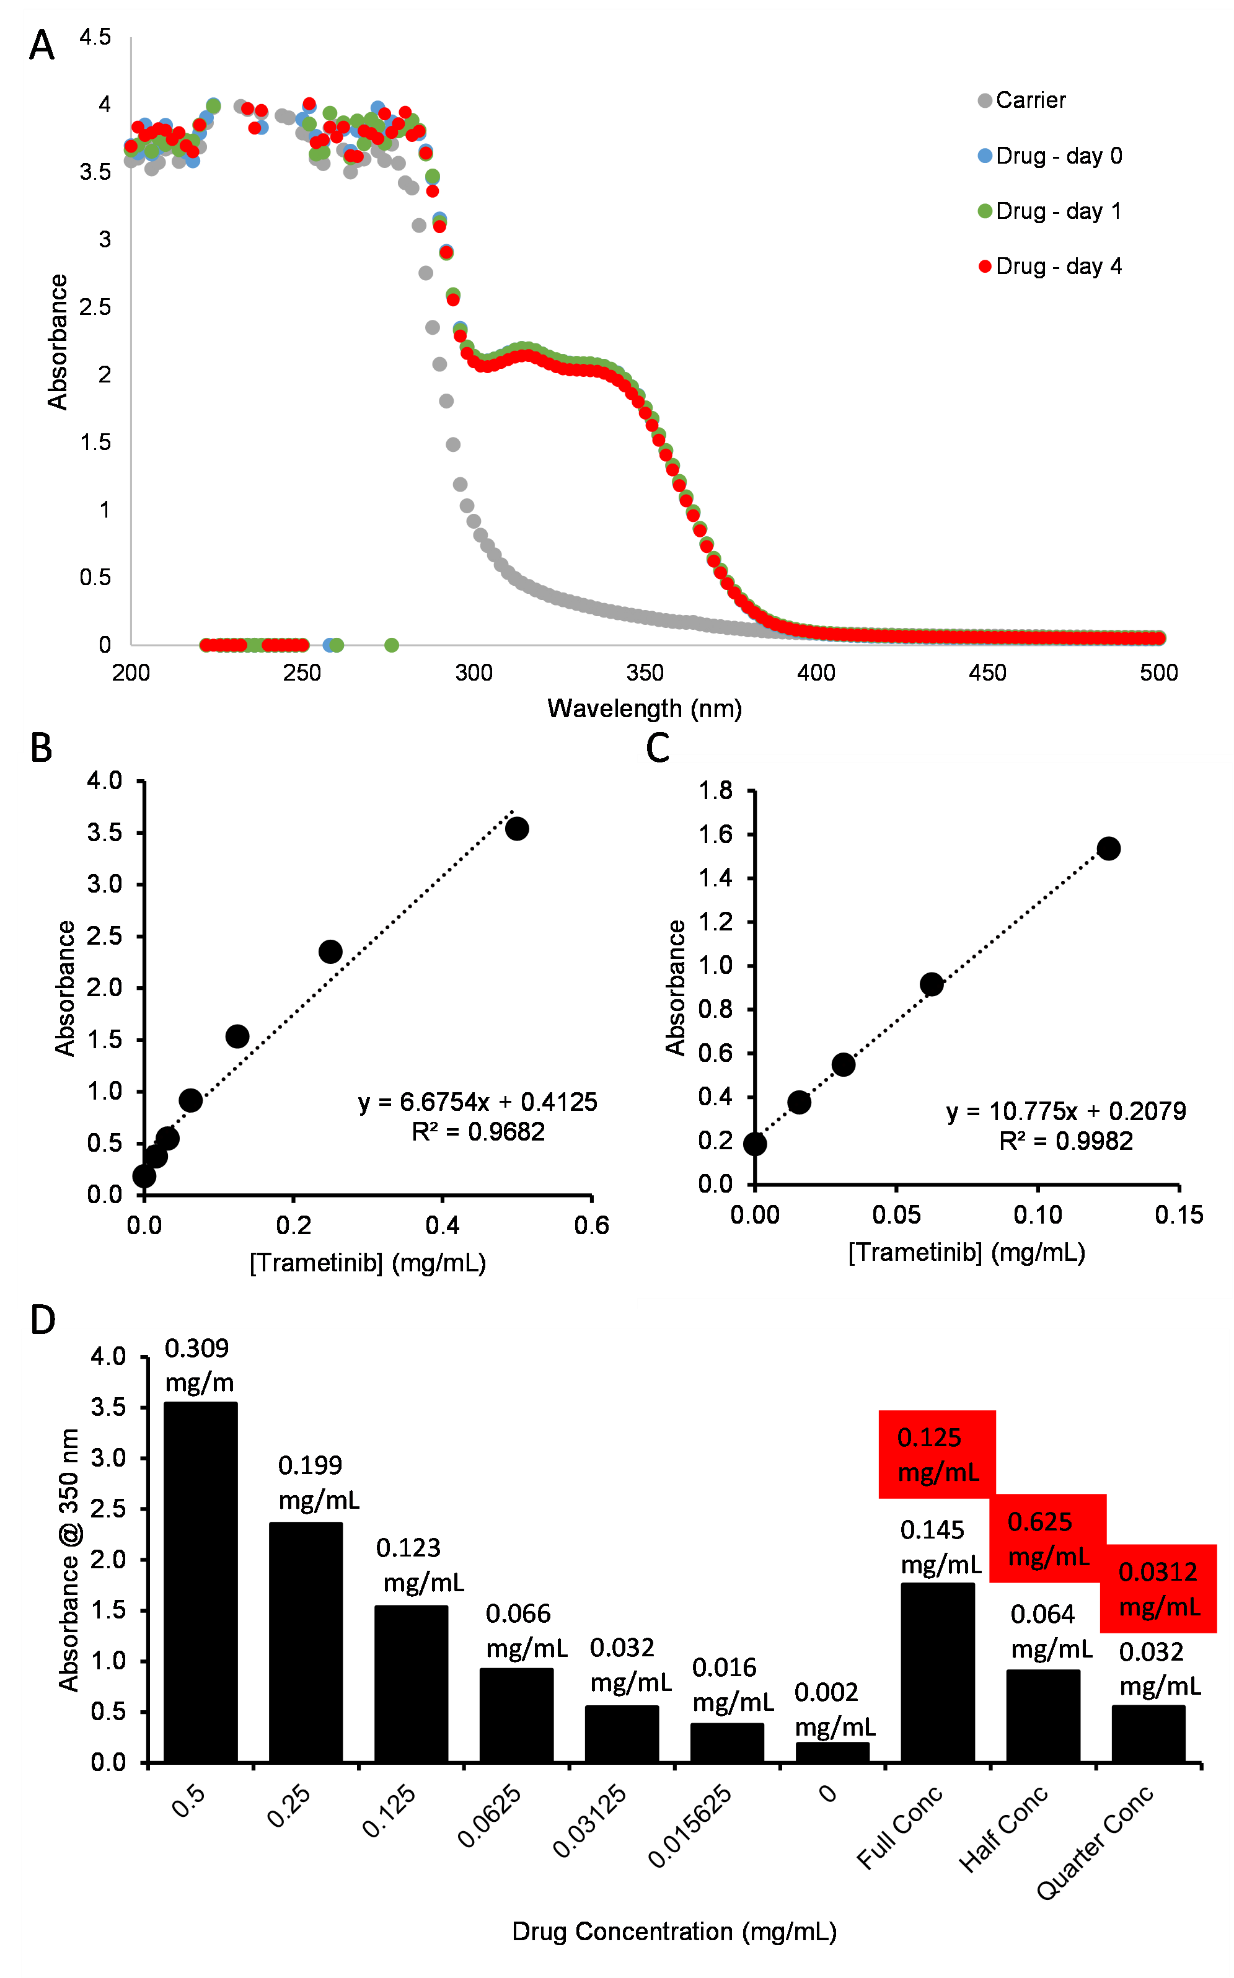


**Figure S2: Characterization of trametinib used for treatment of tumor-bearing mice.** Experiments were performed to verify that the trametinib we prepared in carrier agent for treating mice was stable and at the expected concentration after several days of storage, to verify that mice would receive the anticipated doses. A) Absorbance spectrum of carrier agent, or trametinib in carrier agent, or trametinib after 0, 1, or 4 days of storage in carrier buffer at 4° C. Trametinib has significant absorbance not matched by the carrier between 300-375 nm. No significant changes are observed in the absorbance curve after several days of storage, suggesting the drug is stable under these conditions. B) Trametinib was dissolved in DMSO, and the absorbance at 350 nm at several different concentrations was determined. Absorbance for dissolved trametinib loses linearity around 0.125 mg/mL concentration. C) The linear portion of the data from (B). D) A sample of trametinib in carrier agent was prepared at a concentration of 0.125 mg/mL, stored at for four days at 4° C, and then the absorbance at 350 nm was determined for aliquots at the maximum concentration, and for aliquots prepared as a two-fold or four-fold dilution in carrier agent. The expected concentration is shown in red boxes. The concentration of each sample, as well as the original data from (B), was then calculated based on the fit curve in (C). Overall, the calculated concentrations substantially match the expected value, suggesting that we had successfully dissolved the drug at the expected concentration, and that it had remained in solution after several days of storage.


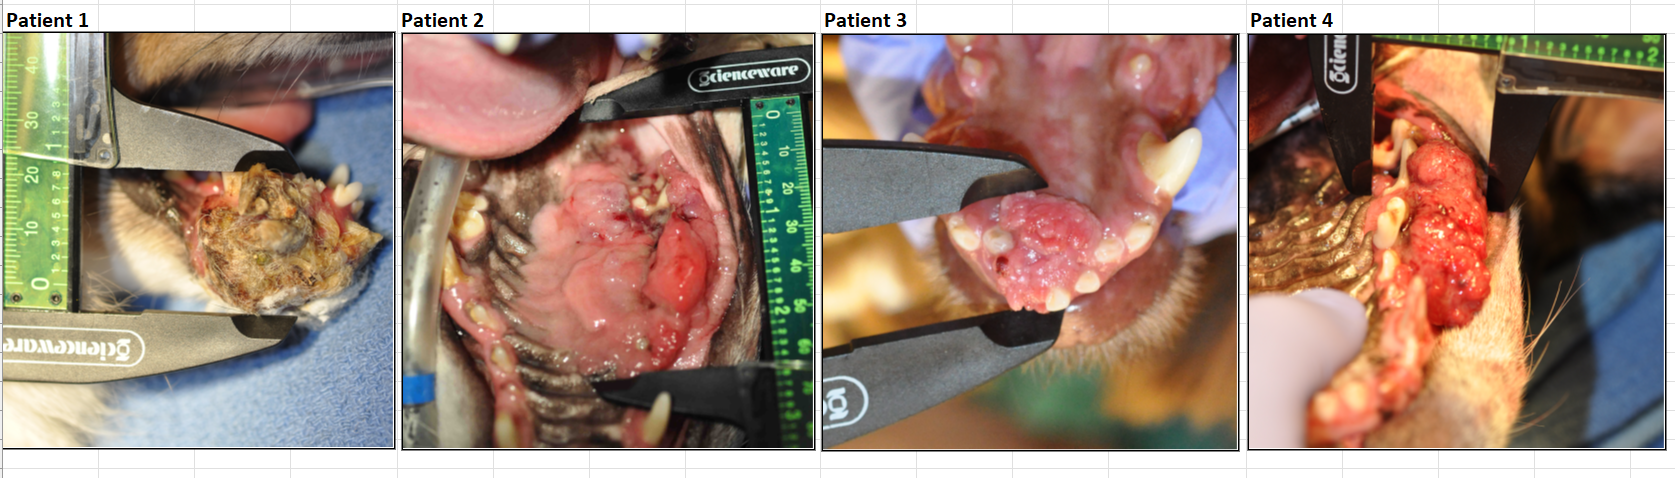


**Figure S3.** Clinical images of cases enrolled in the clinical study. Case numbers correspond to those listed in Table S4.


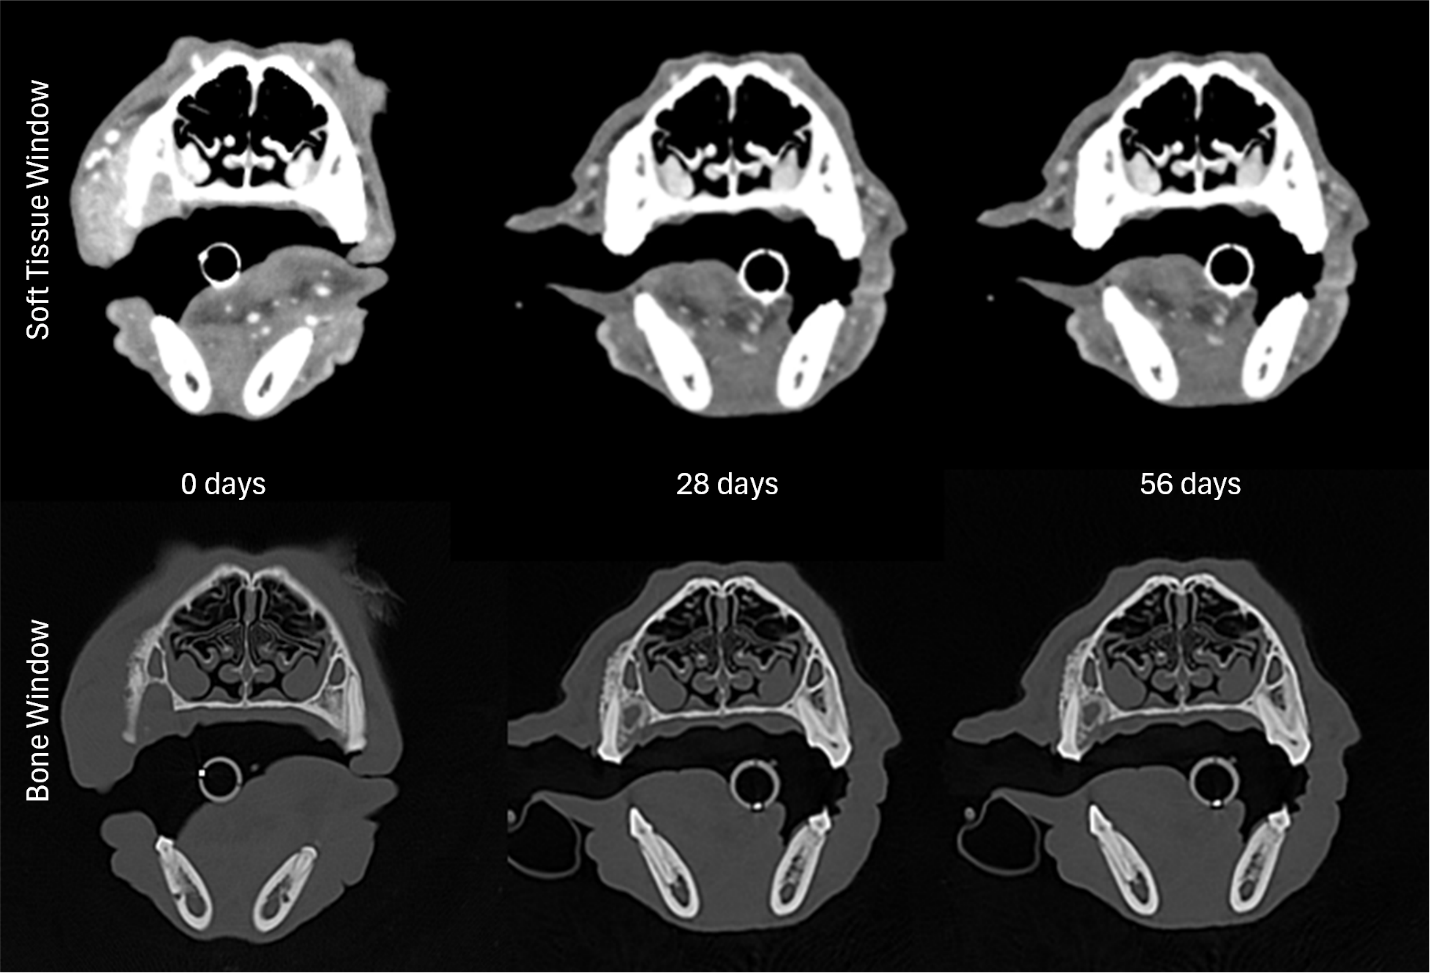


**Figure S4.** Representative transverse CT slice images of one of the cases (patient 4) enrolled in the clinical trial, showing more than 80% reduction in tumor volume after 2 months of treatment, as shown on the contrast-enhanced soft tissue windows (top images) and bone (bottom images) windows.

**Supplementary Table S1:** SNPs chosen to ‘fingerprint’ canine OSCC tumor samples and cell lines. Minor allele is the allele present at the lowest frequency.

| **chr** | **SNP-ID** | **position (bp)** | **Minor-allele** | **Major-allele** |
| --- | --- | --- | --- | --- |
| 1 | BICF2S23541136 | 3946665 | A | T |
| 1 | TIGRP2P16400_rs8609472 | 16956533 | G | A |
| 1 | chr1_30263048 | 30263048 | G | A |
| 1 | BICF2P1047638 | 42822305 | A | G |
| 1 | TIGRP2P4214_rs9118865 | 55131975 | C | G |
| 1 | BICF2P1247762 | 67621428 | G | A |
| 1 | chr1_81822505 | 81822505 | A | G |
| 1 | BICF2G630789611 | 94663921 | A | C |
| 1 | chr1_107371341 | 107371341 | C | G |
| 1 | BICF2S23149320 | 120165275 | G | A |
| 2 | BICF2G630786608 | 3519153 | A | C |
| 2 | chr2_15804340 | 15804340 | G | A |
| 2 | BICF2P1411077 | 27824125 | C | A |
| 2 | BICF2P807944 | 41099632 | A | G |
| 2 | BICF2P439178 | 54017682 | G | A |
| 2 | BICF2P216 | 66324914 | G | A |
| 2 | BICF2P1245823 | 79293897 | G | A |
| 3 | TIGRP2P36501_rs9086277 | 1332812 | A | G |
| 3 | BICF2P1395755 | 14188736 | G | A |
| 3 | BICF2P101135 | 26121477 | C | A |
| 3 | BICF2P713044 | 39318690 | G | A |
| 3 | BICF2P596472 | 53991227 | G | A |
| 3 | BICF2P969447 | 66565392 | G | A |
| 3 | BICF2P147859 | 78825805 | A | C |
| 3 | BICF2G630360437 | 89930289 | G | A |
| 4 | BICF2P683275 | 4378998 | G | A |
| 4 | BICF2P1355541 | 16426039 | T | A |
| 4 | BICF2P1754 | 31764722 | G | A |
| 4 | chr4_46519893 | 46519893 | A | C |
| 4 | BICF2P1346856 | 59786575 | G | A |
| 5 | BICF2P238221 | 7126663 | G | A |
| 5 | BICF2P1165556 | 19026500 | G | A |
| 5 | BICF2G630182762 | 31895829 | A | G |
| 5 | BICF2P253425 | 44454223 | A | G |
| 5 | BICF2P1309829 | 56162422 | G | A |
| 5 | chr5_70036359 | 70036359 | G | A |
| 5 | chr5_84122119 | 84122119 | A | G |
| 6 | BICF2P252126 | 4243203 | A | C |
| 6 | chr6_16753175 | 16753175 | C | G |
| 6 | BICF2S23740638 | 30024051 | A | G |
| 6 | BICF2G630582883 | 43276412 | G | A |
| 6 | BICF2P362756 | 57219900 | A | C |
| 6 | BICF2P236961 | 73655207 | A | G |
| 7 | chr7_2600778 | 2600778 | G | A |
| 7 | TIGRP2P92114_rs8955971 | 16935179 | G | A |
| 7 | BICF2G630555907 | 30246782 | A | G |
| 7 | BICF2P356479 | 43625935 | G | A |
| 7 | BICF2G630560478 | 56788496 | A | G |
| 7 | BICF2P32656 | 71031716 | A | G |
| 8 | BICF2P1388432 | 4172988 | G | A |
| 8 | TIGRP2P108251_rs8979762 | 16026129 | C | G |
| 8 | TIGRP2P111298_rs9160330 | 28028697 | A | T |
| 8 | BICF2P918584 | 41392604 | G | C |
| 8 | BICF2G630413924 | 57503808 | A | G |
| 8 | BICF2S23251740 | 70917145 | A | G |
| 9 | BICF2P1296339 | 2536515 | A | G |
| 9 | chr9_13577257 | 13577257 | G | A |
| 9 | BICF2P664463 | 26794711 | G | A |
| 9 | BICF2G630838658 | 38930922 | A | G |
| 9 | BICF2P1065550 | 50947271 | G | A |
| 10 | BICF2P395308 | 5035030 | G | C |
| 10 | BICF2G630476156 | 17316614 | A | G |
| 10 | BICF2G630481773 | 28089514 | A | G |
| 10 | BICF2P1201124 | 39238642 | G | A |
| 10 | BICF2G630489744 | 52215014 | G | A |
| 10 | BICF2P1336425 | 65055784 | G | A |
| 11 | chr11_3285937 | 3285937 | G | A |
| 11 | BICF2P1025070 | 16230021 | C | A |
| 11 | chr11_28661072 | 28661072 | G | A |
| 11 | BICF2P186535 | 43777655 | A | G |
| 11 | BICF2S23618096 | 55999433 | A | G |
| 11 | BICF2P1444698 | 69503868 | A | G |
| 12 | TIGRP2P155585_rs8778271 | 1197152 | G | A |
| 12 | TIGRP2P157726_rs9252021 | 13109335 | G | A |
| 12 | BICF2P1163775 | 25703714 | G | A |
| 12 | BICF2P497881 | 39763435 | A | C |
| 12 | BICF2G630123420 | 54407328 | G | A |
| 12 | BICF2P501755 | 69075914 | G | A |
| 13 | BICF2S23056118 | 7730667 | G | A |
| 13 | chr13_20310238 | 20310238 | G | A |
| 13 | BICF2P750280 | 33702258 | A | G |
| 13 | TIGRP2P179359_rs8510210 | 46617901 | A | G |
| 13 | BICF2G630747127 | 60928962 | A | G |
| 14 | BICF2G630519109 | 4790093 | G | A |
| 14 | BICF2P986945 | 17018536 | A | G |
| 14 | BICF2G630525440 | 29388449 | A | G |
| 14 | BICF2P1444039 | 54125169 | G | A |
| 15 | BICF2P743107 | 3577963 | G | A |
| 15 | BICF2P962818 | 17598391 | C | A |
| 15 | BICF2P1407142 | 30514971 | A | G |
| 15 | BICF2G630429767 | 45076234 | G | A |
| 15 | BICF2G630419838 | 59623849 | A | G |
| 16 | BICF2P776513 | 3538681 | A | G |
| 16 | BICF2G630848652 | 17365751 | A | G |
| 16 | BICF2G630112989 | 30983383 | G | A |
| 16 | BICF2P840640 | 46021229 | A | G |
| 16 | BICF2P545201 | 58706978 | A | G |
| 17 | BICF2S23249497 | 16715887 | A | G |
| 17 | BICF2S2335595 | 29895389 | A | G |
| 17 | BICF2P110998 | 42785370 | A | G |
| 17 | BICF2P92485 | 57211888 | G | A |
| 18 | BICF2P146165 | 13346057 | G | A |
| 18 | BICF2P4479 | 26925262 | A | G |
| 18 | chr18_39813369 | 39813369 | A | G |
| 18 | BICF2P619768 | 53911413 | A | C |
| 19 | BICF2P203607 | 8776869 | A | G |
| 19 | BICF2G63044917 | 23096937 | A | G |
| 19 | BICF2P1388469 | 36717336 | C | A |
| 19 | chr19_50376989 | 50376989 | G | A |
| 20 | BICF2P475393 | 8276643 | G | A |
| 20 | BICF2G630232326 | 20002432 | A | G |
| 20 | BICF2S23042059 | 31405032 | A | G |
| 20 | BICF2S23532900 | 44837486 | C | A |
| 20 | chr20_56137913 | 56137913 | T | A |
| 21 | TIGRP2P290147_rs8748713 | 6696717 | A | G |
| 21 | BICF2P918268 | 19769176 | T | A |
| 21 | BICF2P248563 | 33859774 | C | A |
| 21 | BICF2G630641960 | 46341646 | G | A |
| 22 | BICF2G630319558 | 14264546 | G | A |
| 22 | BICF2P1042199 | 27801902 | A | G |
| 22 | BICF2P1020973 | 42704323 | C | A |
| 22 | BICF2S23044314 | 56747066 | G | A |
| 23 | BICF2P980057 | 3708581 | G | C |
| 23 | BICF2G630384261 | 16372587 | G | A |
| 23 | BICF2G630375860 | 29136828 | G | A |
| 23 | BICF2P141814 | 44957376 | C | A |
| 24 | chr24_1508901 | 1508901 | A | C |
| 24 | BICF2G630506641 | 15199967 | C | A |
| 24 | BICF2P97146 | 26505617 | A | G |
| 24 | BICF2P1225884 | 43506459 | A | G |
| 25 | BICF2G630469182 | 9937991 | G | A |
| 25 | BICF2P1044393 | 21940692 | A | G |
| 25 | BICF2S23041172 | 37305622 | A | C |
| 25 | BICF2G630157507 | 49489619 | G | A |
| 26 | BICF2P758169 | 1020979 | A | G |
| 26 | BICF2S2299072 | 12102778 | G | A |
| 26 | BICF2P640928 | 24047750 | C | A |
| 26 | TIGRP2P345399_rs8786874 | 37724948 | C | G |
| 27 | TIGRP2P358002_rs9135220 | 6152233 | C | A |
| 27 | BICF2S22933352 | 18877756 | A | G |
| 27 | BICF2P571872 | 30170996 | G | A |
| 27 | BICF2G630154739 | 42649843 | A | C |
| 28 | BICF2G630276728 | 7933242 | A | G |
| 28 | BICF2G630270137 | 20700462 | C | G |
| 28 | BICF2P114685 | 32367945 | A | C |
| 29 | BICF2S2291310 | 6437058 | G | C |
| 29 | BICF2S23412390 | 19644867 | A | G |
| 29 | BICF2P1310539 | 37358572 | A | C |
| 30 | chr30_5292208 | 5292208 | G | A |
| 30 | BICF2P184259 | 18691641 | A | C |
| 30 | chr30_33805460 | 33805460 | A | G |
| 31 | BICF2P1161188 | 2676188 | G | A |
| 31 | BICF2P172449 | 15010305 | G | A |
| 32 | BICF2P304470 | 10278819 | A | T |
| 32 | BICF2P533559 | 23304386 | A | G |
| 32 | BICF2S23915239 | 36111526 | C | A |
| 33 | BICF2P1136726 | 2803236 | C | G |
| 33 | BICF2P476623 | 13861690 | A | G |
| 33 | BICF2G63077602 | 26537125 | A | G |
| 34 | TIGRP2P393469_rs9046107 | 9047555 | A | G |
| 34 | chr34_22646059 | 22646059 | G | A |
| 34 | BICF2S23030172 | 35789243 | G | A |
| 35 | BICF2G630771505 | 7090278 | G | A |
| 35 | BICF2P1402690 | 20055955 | A | G |
| 36 | BICF2G630758265 | 26217448 | C | G |
| 37 | BICF2S23536320 | 12854228 | G | A |
| 37 | BICF2P1306362 | 24970221 | A | G |
| 38 | BICF2G63067837 | 21826711 | A | G |

**Supplementary Table S2**: Highest 5 ^π values calculated using the 168 fingerprint SNPs, between samples in the present study (270858, 294236, 301313, 301814, 303520, 322742, 324672) and 880 dogs previously genotyped. Note that the tumor, PDX, and cell-line from each of the respective samples all have a pairwise ^π of 1.00.

| **270858** | **294236** | **301313** | **301814** | **303520** | **322742** | **324672** |
| --- | --- | --- | --- | --- | --- | --- |
| 0.218 | 0.0769 | 0.1757 | 0.0437 | 0.0915 | 0.2930 | 0.1727 |
| 0.1979 | 0 | 0.1065 | 0.0269 | 0.0631 | 0.2804 | 0.1605 |
| 0.1850 | 0 | 0.0927 | 0.0154 | 0.0614 | 0.2675 | 0.1513 |
| 0.1708 | 0 | 0.0681 | 0 | 0.0580 | 0.2616 | 0.1221 |
| 0.1581 | 0 | 0.0661 | 0 | 0.0324 | 0.2589 | 0.1191 |

**Supplementary Table S3:** IC50 values for each drug 5-fluorouracil (5-FU), doxetaxel (Docet.), cetuximab (Cetux.), carmustine (Carmust.), temozolomide (Temolzol.), trametinib (Tramet.), and dabrafenib (Dabraf.) against each cell line examined. The average IC50 from the NCI-60 cells is also shown.

|  | IC50 Values | | | | | | |
| --- | --- | --- | --- | --- | --- | --- | --- |
|  | Standard of Care | | | Alternate Chemotherapeutics | | Targeted Therapies | |
| Cell Line | 5-FU (M) | Docet. (nM) | Cetux. (g/mL) | Carmust. (M) | Temozol. (M) | Tramet. (M) | Dabraf. (M) |
| Co-B-658 | 0.68 | 15.09 | > 200 | 4.18 | 151 | 0.1317 | 6.519 |
| Co-C-958 | 0.47 | 7.35 | 146.3 | 15.62 | 776.7 | 1.34 | 4.97 |
| Co-F-1236 | 1.85 | 0.5501 | 165.2 | 37.58 | 186 | 0.008 | 5.317 |
| Co-L-1236 | 1.041 | 0.135 | > 200 | 8.031 | 45.03 | 0.013 | 7.205 |
| Co-G-1114 | 0.01 | 13.7 | > 200 | 4.2 | 52 | 0.008 | > 20 |
| Co-N-1242 | 0.01 | 2.46 | > 200 | > 50 | 225 | > 2.5 | > 20 |
| Co-I-913 | > 5 | > 20 | > 200 | > 50 | 349.8 | 0.014 | > 20 |
| Co-J-1220 | 6.36 | 4.795 | 169.7 | 30.99 | 1098 | 0.676 | > 20 |
| Co-O-172 | 1.82 | > 20 | > 200 | 69.81 | 1215 | 0.033 | 0.212 |
|  |  |  |  |  |  |  |  |
| NCI-60 avg. | 0.899 | 34.2 | 5 | 55.2 | 96.7 | 0.232 | 5.7 |

**Supplementary Table S4**: Client-owned dogs diagnosed with oral squamous cell carcinoma and enrolled in the trametinib clinical trial.

| **Patient** | **Breed** | **Sex** | **Age (years)** | **Body weight (kg)** | **Tumor location** |
| --- | --- | --- | --- | --- | --- |
| 1 | Australian shepherd | Female spayed | 2 | 4.8 | Rostral mandible |
| 2 | Mixed breed | Neutered male | 13 | 14.8 | Right caudal maxilla |
| 3 | Field spaniel | Neutered male | 10 | 22.2 | Rostral mandible |
| 4 | Mixed breed | Female spayed | 7 | 25.2 | Right caudal maxilla |

**Supplementary Table S5**. Tumor volume measurements at pre-enrollment and subsequent visits of cases enrolled in the clinical study. Patient numbers correspond to those listed in Table S4 and Figure S5.

|  | **Pre-enrollment** | **~28-day CT** | **~56-day CT** |  |  |
| --- | --- | --- | --- | --- | --- |
| **Patient** | **Tumor Volume (cm3)** | **Tumor Volume (cm3)** | **Tumor Volume (cm3)** | **Tumor volume % at last visit compared to pre-enrollment CT** | **Comments** |
| 1 | 12.08 | 18.4 | n/a | 152.3 | Withdrawn after 28d. |
| 2 | 46.6 | 145.42 | n/a | 312.1 | Withdrawn after 28d. |
| 3 | 2.56 | 1.58 | 1.26 | **49.2** |  |
| 4 | 13.8468 | 2.982 | 2.43 | **17.5** |  |
